# Supplementary material
Source: PubMed Central journal article supplement (PMC4538503)
Supplement: AAC.01304-15_zac009154384so1.pdf [file AAC.01304-15_zac009154384so1.pdf]

## Supplemental Information

Inhibition of AAC(6')-Ib-Mediated Resistance to Amikacin in *Acinetobacter baumannii* by an Antisense Peptide-Conjugated 2'4'-Bridge Nucleic Acid (BNA)/DNA Hybrid Oligomer

Christina Lopez, Brock A. Arivett, Luis A. Actis, and Marcelo E. Tolmasky

**Table 1S. Bacteria harboring the *aac(6')*-Ib *A. baumannii* A155 allele**

| <b>Bacteria/Genetic element</b>                                             | <b>Accession number</b> | <b>Reference</b> |
|-----------------------------------------------------------------------------|-------------------------|------------------|
| <i>Salmonella</i> Typhimurium 202, plasmid pSEM                             | KM406490                | (1)              |
| <i>Escherichia fergusonii</i> C-X5A, class 1 integron                       | KM278199                | Unpublished      |
| <i>Enterobacter cloacae</i> EB5370/10, plasmid, integron                    | NG_041529               | (2)              |
| <i>Escherichia coli</i> NF512663, class I integron                          | JN108884                | Unpublished      |
| <i>Escherichia coli</i> NF506946, class I integron                          | HQ880268                | Unpublished      |
| <i>Klebsiella pneumoniae</i> NF808096, class I integron                     | HQ880266                | Unpublished      |
| <i>Escherichia coli</i> NF602609, class I integron                          | HQ880261                | Unpublished      |
| <i>Pseudomonas aeruginosa</i> , transposon, class I integron                | GU250439                | Unpublished      |
| <i>Klebsiella oxytoca</i> EB5294/9, class I integron                        | GU181269                | (3)              |
| <i>Klebsiella pneumoniae</i> KP3686, class I integron                       | GU181265                | (3)              |
| <i>Acinetobacter baumannii</i> ACICU                                        | CP000863                | (4)              |
| <i>Enterobacter cloacae</i> E701, class I integron ( <i>aac(6')</i> -Ib-cr) | EU091084                | (5)              |
| <i>Acinetobacter baumannii</i> , class I integron                           | EF690695                | (6)              |
| <i>Escherichia coli</i> plasmid p1658/97                                    | AF550679                | (7)              |
| <i>Escherichia coli</i> , class I integron                                  | AY152821                | (8)              |
| <i>Pseudomonas aeruginosa</i> , class I integron                            | DQ089809                | (9)              |
| <i>Acinetobacter baumannii</i> , class I integron                           | AY307114                | (10)             |
| <i>Klebsiella pneumoniae</i> ILT-3, class I integron                        | AF458080                | (11)             |
| <i>Acinetobacter baumannii</i> P17, class I integron                        | DQ370505                | (12)             |
| <i>Escherichia coli</i> , class I integron                                  | AY912492                | Unpublished      |
| <i>Pseudomonas aeruginosa</i> , class I integron                            | AB214531                | (13)             |
| <i>Escherichia coli</i>                                                     | AB212941                | (14)             |
| <i>Pseudomonas aeruginosa</i> , class I integron                            | AJ585042                | (15)             |

|                                                                           |           |             |
|---------------------------------------------------------------------------|-----------|-------------|
| <i>Acinetobacter baumannii</i> , class I integron                         | AJ319747, | (16)        |
|                                                                           | AJ313334  |             |
| <i>Klebsiella pneumoniae</i> , integron                                   | AF282595  | Unpublished |
| <i>Klebsiella pneumoniae</i> , integron                                   | AF207065  | Unpublished |
| <i>Shigella flexneri</i> A14, class 1 integron <sup>1</sup>               | JN651402  | Unpublished |
| <i>Aeromonas allosaccharophila</i> ER.1.16, class 1 integron <sup>1</sup> | HQ170517  | (17)        |
| <i>Burkholderia cepacia</i> NF915246, class I integron <sup>1</sup>       | HQ880251  | Unpublished |

---

Nucleotide sequences with 100% homology and coverage, and selected sequences with 99% homology that are identical to the region targeted by the antisense oligonucleotides when the *aac(6')-Ib* sequence from *A. baumannii* A155 is compared using Blast.

#### REFERENCES

1. **Carattoli A, Seiffert SN, Schwendener S, Perreten V, Endimiani A.** 2015. Differentiation of IncL and IncM plasmids associated with the spread of clinically relevant antimicrobial resistance. *PLoS One* **10**:e0123063.
2. **Juhász E, Janvari L, Toth A, Damjanova I, Nobilis A, Kristof K.** 2012. Emergence of VIM-4- and SHV-12-producing *Enterobacter cloacae* in a neonatal intensive care unit. *Int. J. Med. Microbiol.* **302**:257-260.
3. **Kristof K, Toth A, Damjanova I, Janvari L, Konkoly-Thege M, Kocsis B, Koncan R, Cornaglia G, Szego E, Nagy K, Szabo D.** 2010. Identification of a *bla*VIM-4 gene in the internationally successful *Klebsiella pneumoniae* ST11 clone and in a *Klebsiella oxytoca* strain in Hungary. *J. Antimicrob. Chemother.* **65**:1303-1305.

4. **Iacono M, Villa L, Fortini D, Bordoni R, Imperi F, Bonnal RJ, Sicheritz-Ponten T, De Bellis G, Visca P, Cassone A, Carattoli A.** 2008. Whole-genome pyrosequencing of an epidemic multidrug-resistant *Acinetobacter baumannii* strain belonging to the European clone II group. *Antimicrob. Agents Chemother.* **52**:2616-2625.
5. **Quiroga MP, Andres P, Petroni A, Soler Bistue AJ, Guerriero L, Vargas LJ, Zorreguieta A, Tokumoto M, Quiroga C, Tolmasky ME, Galas M, Centron D.** 2007. Complex class 1 integrons with diverse variable regions, including *aac(6)-Ib-cr*, and a novel allele, *qnrB10*, associated with ISCR1 in clinical enterobacterial isolates from Argentina. *Antimicrob. Agents Chemother.* **51**:4466-4470.
6. **Loli A, Tzouvelekis LS, Gianneli D, Tzelepi E, Miriagou V.** 2008. Outbreak of *Acinetobacter baumannii* with chromosomally encoded VIM-1 undetectable by imipenem-EDTA synergy tests. *Antimicrob. Agents Chemother.* **52**:1894-1896.
7. **Zienkiewicz M, Kern-Zdanowicz I, Golebiewski M, Zylinska J, Mieczkowski P, Gniadkowski M, Bardowski J, Ceglowski P.** 2007. Mosaic structure of p1658/97, a 125-kilobase plasmid harboring an active amplicon with the extended-spectrum beta-lactamase gene *blaSHV-5*. *Antimicrob. Agents Chemother.* **51**:1164-1171.
8. **Scoulica EV, Neonakis IK, Gikas AI, Tselentis YJ.** 2004. Spread of *bla*(VIM-1)-producing *E. coli* in a university hospital in Greece. Genetic analysis of the integron carrying the *bla*(VIM-1) metallo-beta-lactamase gene. *Diagn. Microbiol. Infect. Dis.* **48**:167-172.

9. **Poirel L, Brinas L, Verlinde A, Ide L, Nordmann P.** 2005. BEL-1, a novel clavulanic acid-inhibited extended-spectrum beta-lactamase, and the class 1 integron In120 in *Pseudomonas aeruginosa*. *Antimicrob. Agents Chemother.* **49**:3743-3748.
10. **Zarrilli R, Crispino M, Bagattini M, Barretta E, Di Popolo A, Triassi M, Villari P.** 2004. Molecular epidemiology of sequential outbreaks of *Acinetobacter baumannii* in an intensive care unit shows the emergence of carbapenem resistance. *J. Clin. Microbiol.* **42**:946-953.
11. **Poirel L, Decousser JW, Nordmann P.** 2003. Insertion sequence ISEcp1B is involved in expression and mobilization of a *bla*(CTX-M) beta-lactamase gene. *Antimicrob. Agents Chemother.* **47**:2938-2945.
12. **Kraniotaki E, Manganelli R, Platsouka E, Grossato A, Paniara O, Palu G.** 2006. Molecular investigation of an outbreak of multidrug-resistant *Acinetobacter baumannii*, with characterisation of class 1 integrons. *Int. J. Antimicrob. Agents* **28**:193-199.
13. **Yan H, Shi L, Yamasaki S, Li X, Yang L, Miyoshi S.** 2005. A plasmidic class 1 integron from five *Pseudomonas aeruginosa* clinical strains harbored *aacA4* and nonsense-mutated *cmlA1* gene cassettes. *J. Health Sci.* **53**:750-755.
14. **Su J, Shi L, Yang L, Xiao Z, Li X, Yamasaki S.** 2006. Analysis of integrons in clinical isolates of *Escherichia coli* in China during the last six years. *FEMS Microbiol. Lett.* **254**:75-80.
15. **Patzer J, Toleman MA, Deshpande LM, Kaminska W, Dzierzanowska D, Bennett PM, Jones RN, Walsh TR.** 2004. *Pseudomonas aeruginosa* strains

- harbouring an unusual *bla*VIM-4 gene cassette isolated from hospitalized children in Poland (1998-2001). *J. Antimicrob. Chemother.* **53**:451-456.
16. **Gombac F, Riccio ML, Rossolini GM, Lagatolla C, Tonin E, Monti-Bragadin C, Lavenia A, Dolzani L.** 2002. Molecular characterization of integrons in epidemiologically unrelated clinical isolates of *Acinetobacter baumannii* from Italian hospitals reveals a limited diversity of gene cassette arrays. *Antimicrob. Agents Chemother.* **46**:3665-3668.
17. **Moura A, Pereira C, Henriques I, Correia A.** 2012. Novel gene cassettes and integrons in antibiotic-resistant bacteria isolated from urban wastewaters. *Res. Microbiol.* **163**:92-100.
